# Supplementary material
Source: PubMed Central journal article supplement (PMC7369146)

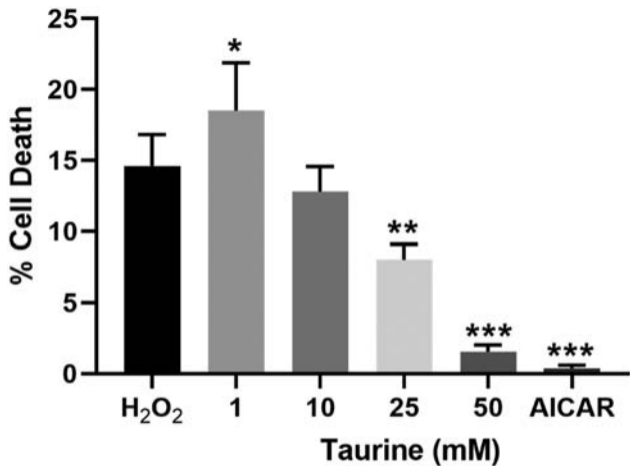

Figure 7

### Pyruvate Culture Media

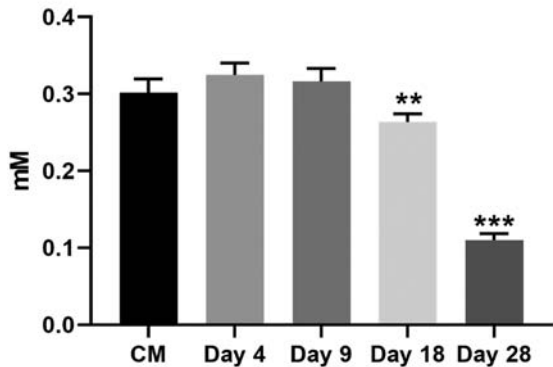

### Pyruvate Cell Lysate

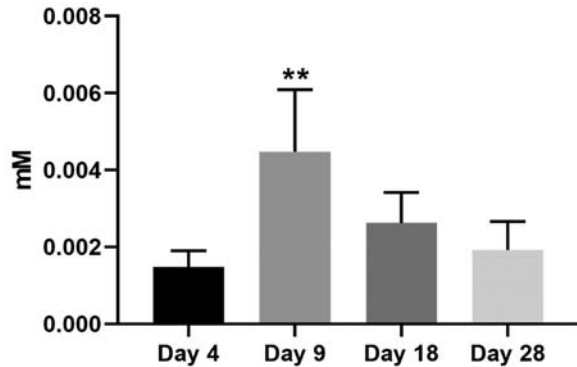

Figure 8

# Taurine

## A

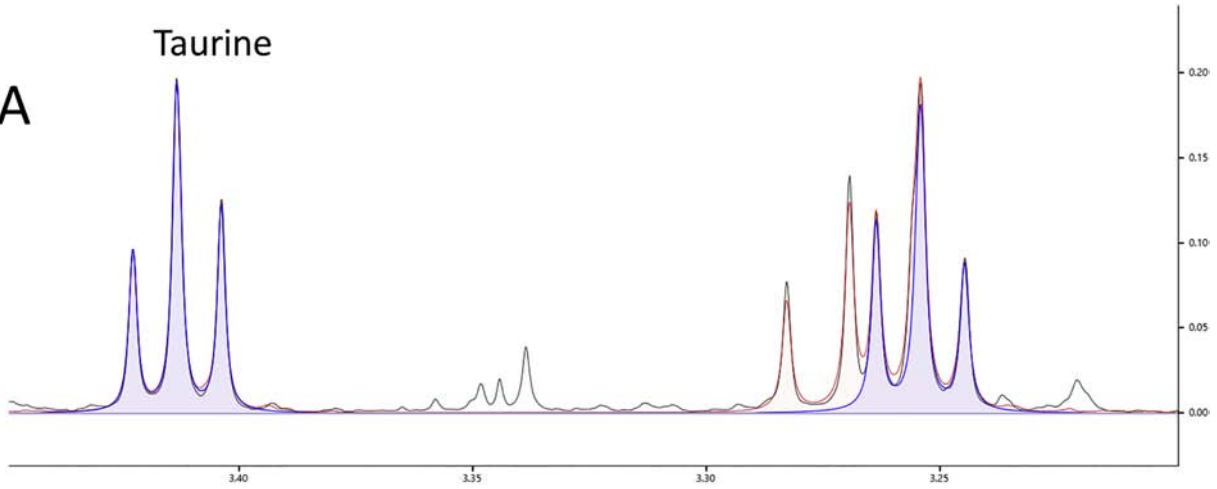

## B

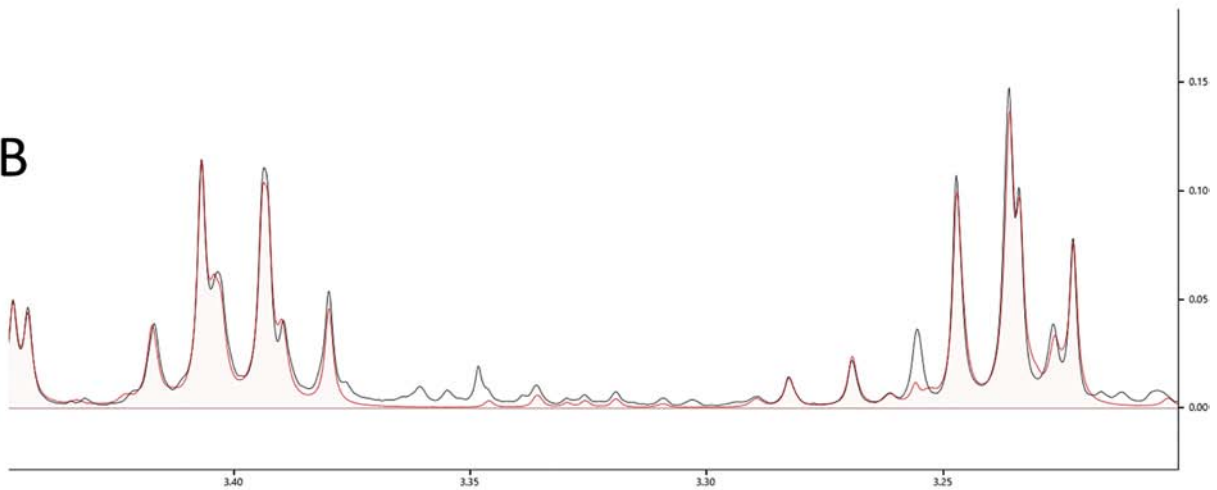

## C

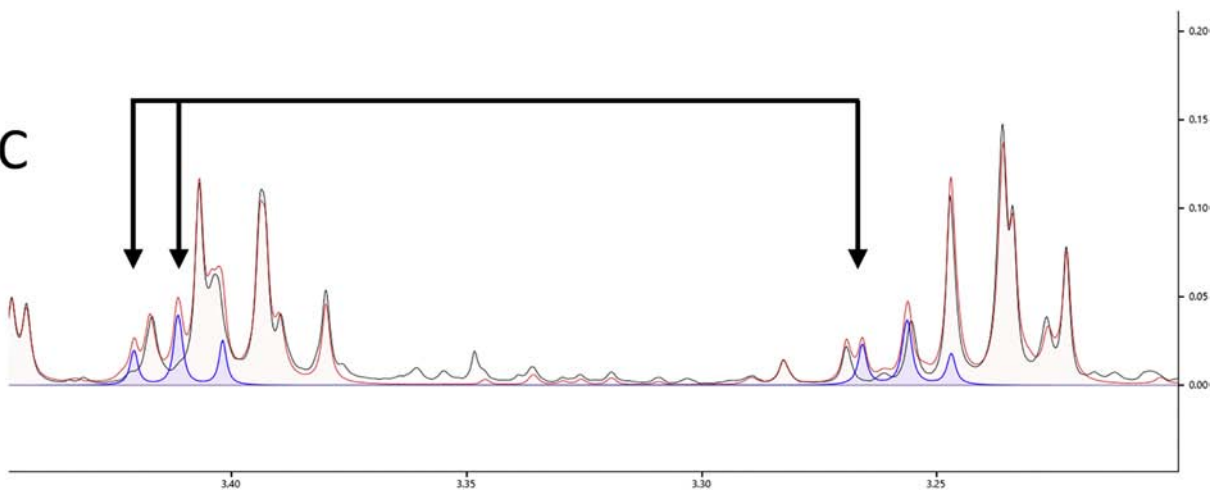

Figure 9

Supplement: NIHMS1591931-supplement-1.pdf [file NIHMS1591931-supplement-1.pdf]
